# Supplementary material for: Systems Biology Understanding of the Effects of Lithium on Affective and Neurodegenerative Disorders
Source: Front Neurosci. 2018 Dec 13;12:933. doi: 10.3389/fnins.2018.00933 (PMC6300566; doi:10.3389/fnins.2018.00933)
Supplement: Supplementary file 1 [file Data_Sheet_1.XLSX]

## Sheet: Sheet1
Disease	Gm	invGm
Dravet_syndrome	0.000581753	1718.94
HTLV1-Associated_Myelopathy_(HAM)	0.00159527	626.853
Congenital_pain_insensitivity_with_anhidrosis	0.0021414	466.984
Hemorrhagic_destruction_of_the_brain,_subependymal_calcification,_and_cataracts	0.00239153	418.143
Rasmussen_encephalitis	0.00341124	293.148
Lattice_corneal_dystrophies_(LCD)	0.00379298	263.645
Subependymal_giant_cell_astrocytoma	0.00406426	246.047
Bipolar_Disorder	0.00417907	239.288
Familial_episodic_pain_syndrome_(FEPS)	0.0043179	231.594
Familial_exudative_vitreoretinopathy_(FEVR)	0.0048698	205.347
Focal_dermal_hypoplasia	0.0048698	205.347
Choroid_plexus_papilloma	0.00505	198.02
Juvenile-onset_dystonia	0.0054445	183.672
Prion_diseases	0.00571418	175.003
Axenfeld-Rieger_syndrome_(ARS)	0.00591305	169.117
Congenital_stromal_corneal_dystrophy_(CSCD)	0.00591305	169.117
Ring_dermoid_of_cornea	0.00591305	169.117
Stapes_ankylosis_with_broad_thumb_and_toes	0.00591305	169.117
Benign_familial_neonatal_and_infantile_epilepsies	0.00651683	153.449
Alzheimer's_disease	0.00672783	148.636
Neurosis	0.00757511	132.011
Schizophrenia	0.00757511	132.011
Pituitary_adenomas	0.00806784	123.949
Febrile_seizures	0.00923194	108.32
Episodic_ataxias	0.00956519	104.546
Familial_or_sporadic_hemiplegic_migraine	0.00956519	104.546
Cerebral_amyloid_angiopathy_(CAA)	0.0111894	89.3699
Major_depressive_disorder	0.0111894	89.3699
Epileptic_encephalopathy_with_continuous_spike-waves_during_slow-wave_sleep	0.0113829	87.851
Frontotemporal_lobar_degeneration_(FTLD)	0.0131881	75.8261
Cerebral_palsy	0.013712	72.9288
Generalized_epilepsy_and_paroxysmal_dyskinesia_(GEPD)	0.0144153	69.3705
Amyotrophic_lateral_sclerosis_(ALS)	0.014869	67.2542
Fleck_corneal_dystrophy_(FCD)	0.0158512	63.0869
Alcohol_dependence	0.0159211	62.8098
Band-like_calcification_with_simplified_gyration_and_polymicrogyria_(BLC-PMG)	0.0167086	59.8494
Congenital_stationary_night_blindness_(CSNB)	0.0176722	56.5861
Congenital_hydrocephalus	0.0227158	44.0223
Hereditary_sensory_and_autonomic_neuropathy_(HSAN)	0.0232048	43.0945
Spinocerebellar_ataxia_(SCA)	0.0237526	42.1007
Autosomal_dominant_nocturnal_frontal_lobe_epilepsy_(ADNFLE)	0.0253535	39.4423
Aromatic_L-amino_acid_decarboxylase_(AADC)_deficiency	0.0274913	36.3751
Alternating_hemiplegia_of_childhood	0.0317497	31.4964
Huntington's_disease	0.0322239	31.0329
Arts_syndrome	0.0326309	30.6458
Neurodegeneration_with_brain_iron_accumulation_(NBIA)	0.0334026	29.9378
Neurodegeneration_due_to_cerebral_folate_transport_deficiency	0.0394402	25.3549
Congenital_fibrosis_of_the_extraocular_muscles_(CFEOM)	0.0406088	24.6252
Autosomal_dominant_striatal_degeneration_(ADSD)	0.0481921	20.7503
Reticular_dysgenesis	0.0481921	20.7503
Early_infantile_epileptic_encephalopathy	0.0484524	20.6388
Idiopathic_generalied_epilepsies_(IGEs)	0.0549045	18.2135
Progressive_external_ophthalmoplegia_(PEO)	0.0639755	15.631
L1_syndrome	0.0700089	14.2839
Diabetic_retinopathy	0.0723029	13.8307
Congenital_mirror_movements_(CMM)	0.073558	13.5947
Cone-rod_dystrophy_(CORD)_and_cone_dystrophy_(COD)	0.0756721	13.2149
Primary_dystonia	0.0774862	12.9055
GLUT1_deficiency_syndrome_(GLUT1DS)	0.0799637	12.5057
Vitreoretinal_degeneration	0.0855827	11.6846
Canavan_disease	0.0886426	11.2813
Leber_congenital_amaurosis_(LCR)	0.0954961	10.4716
Hyperekplexia	0.0986371	10.1382
Congenital_myasthenic_syndrome	0.0995709	10.0431
Familial_amyloidosis	0.101199	9.88154
Achromatopsia	0.118822	8.41596
Bradyopsia	0.118822	8.41596
Eating_Disorders	0.130189	7.68112
Familial_flecked_retina_syndrome	0.134428	7.4389
Peters_anomaly	0.160582	6.22733
Cataract	0.162015	6.17227
Machado-Joseph_disease	0.162015	6.17227
Marinesco-Sjogren_syndrome	0.162015	6.17227
Wolfram_syndrome_(WFS)	0.162015	6.17227
Pontocerebellar_hypoplasia	0.172071	5.81156
Core_neuroacanthocytosis_syndromes	0.185406	5.39356
Fragile_X_tremorataxia_syndrome_(FXTAS)	0.186702	5.35612
Leukoencephalopathy_with_vanishing_white_matter	0.186702	5.35612
Spinal_muscular_atrophy_(SMA)	0.186702	5.35612
PNPLA6-related_disorders	0.20597	4.85509
Parkinson's_disease	0.209916	4.76381
Retinitis_pigmentosa_(RP)	0.21904	4.56538
Dopamine_beta-hydroxylase_deficiency	0.250103	3.99836
Primary_congenital_glaucoma_(PCG)	0.273632	3.65454
Ataxia_telangiectasia	0.276793	3.61281
Retinal_vasculopathy_with_cerebral_leukodystrophy_(RVCL)	0.282349	3.54171
Progressive_myoclonic_epilepsy_(PME)	0.28843	3.46704
Infantile_bilateral_striatal_necrosis_(IBSN)	0.386011	2.5906
Charcot-Marie-Tooth_disease_(CMT)	0.398107	2.51189
Leukoencephalopathy_with_brain_stem_and_spinal_cord_involvement_and_lactate_elevation_(LBSL)	0.398107	2.51189
Myopathy_with_lactic_acidosis_and_sideroblastic_anaemia_(MLASA)	0.398107	2.51189
Primary_open_angle_glaucoma	0.454433	2.20054
Refsum_disease	0.457009	2.18814
Leukoencephalopathy_with_dystonia_and_motor_neuropathy	0.46557	2.14791
Coenzyme_Q10_deficiency	0.471907	2.11906
Roussy-Levy_syndrome	0.550026	1.81809
Pyridoxine-dependent_epilepsy_(PDE)	0.564507	1.77146
Asperger_syndrome	0.661976	1.51063
Cockayne_syndrome	0.692912	1.44319
Leber_optic_atrophy	0.798085	1.253
Amish_infantile_epilepsy_syndrome	0.813543	1.22919
Cerebral_dysgenesis,_neuropathy,_ichthyosis,_and_palmoplantar_keratoderma_syndrome	0.870551	1.1487
Stargardt_disease_(STGD)	0.872259	1.14645
West_syndrome	0.915366	1.09246
Spondyloocular_syndrome_(SOS)	0.950332	1.05226
Aminoacylase_1_deficiency	1	1
Brown-Vialetto-Van_Laere_syndrome	1	1
Diabetic_neuropathy	1	1
Macular_corneal_dystrophy_(MCD)	1	1
Multiple_system_atrophy	1	1
Pyridox(am)ine-5'-phosphate_oxidase_(PNPO)_deficiency	1	1
Wernicke_encephalopathy	1	1
